# Supplementary material for: A blade-coated highly efficient thick active layer for non-fullerene organic solar cells
Source: Royal Society of Chemistry journal article supplement (doi:10.1039/c9ta09799f), 2019-01-01
Supplement: c9ta09799f1.pdf [file c9ta09799f1.pdf]

## Electronic Supplementary Information

### **Blade-coated Highly Efficient Thick Active Layer of Non-fullerene Organic Solar Cells**

Lin Zhang,<sup>ab</sup> Heng Zhao,<sup>a</sup> Baojun Lin,<sup>a</sup> Jian Yuan,<sup>a</sup> Xianbin Xu,<sup>a</sup> Jingnan Wu,<sup>c</sup> Ke Zhou,<sup>a</sup> Xia Guo,<sup>c</sup> Maojie Zhang<sup>c</sup> and Wei Ma<sup>\*a</sup>

<sup>a</sup>State Key Laboratory for Mechanical Behavior of Materials, Xi'an Jiaotong University, Xi'an 710049, China. E-mail: [msewma@xjtu.edu.cn](mailto:msewma@xjtu.edu.cn)

<sup>b</sup>Hunan Key Laboratory for Super Microstructure and Ultrafast Process, School of Physics and Electronics, Central South University, Changsha 410083, China.

<sup>c</sup>State and Local Joint Engineering Laboratory for Novel Functional Polymeric Materials, Laboratory of Advanced Optoelectronic Materials, College of Chemistry, Chemical Engineering and Materials Science, Soochow University, Suzhou 215123, China

## Experiment section

### Device fabrication:

Organic solar cells were fabricated with a conventional device configuration of ITO/PEDOT:PSS/PM6:IT-4F/ZrAcac/Al. The patterned ITO substrates were cleaned by sonication in detergent water, deionized water, acetone and isopropanol for 20 min of each step. After UVO treatment for 20 min, an hole-transporting layer of PEDOT:PSS (Heraeus Clevious P VP AI 4083) was deposited by spin-coating at 5000 rpm for 30 s, followed by thermal annealing at 150 °C for 15 min in air. The active layer solution was prepared in chlorobenzene (with 0.25% DIO by volume) at a total concentration of 20 mg mL<sup>-1</sup> with the D/A ratio of 1:1 by weight, accompanied by string on a hotplate at 50 °C over 8 h. After the solution cooling to room temperature, an active layer was deposited by blade-coating or spin-coating at ambient environment. The silicon wafer was used as the blade with UVO treatment for 20 min. The velocity was 20~50 mm s<sup>-1</sup>, and the gap between blade and substrate was 100~600 μm. The film thickness was controlled by changing the gap and velocity. Moreover, the substrate temperature was changed (30 °C, 50 °C, 70 °C) by a controllable heating element. The blade-coating was performed after the dropping of ~10 μL solution at the beginning of the substrate area in air. And then, the residual solution on the back of substrate was erased by cotton swab with chloroform. For spin-coating, the solution was spin-coated on the PEDOT:PSS layer in the air with a various rotate speed to achieve different-thickness films. There are no any other processing treatments (such as thermal annealing or solvent annealing) for all the blade-coated active layer and spin-coated active layer. Then, a thin ZrAcac<sup>1</sup> layer (1.2 mg/mL in ethanol, 3000 rpm for 30 s, about 15 nm) was spin-coated on the active layer in the N<sub>2</sub>-filled glovebox. Finally, a 100 nm Al was deposited as anode by vacuum evaporation under vacuum (<1×10<sup>-4</sup> Pa). The device configuration of organic solar cells for the measurement of long term stability is ITO/ZnO/PM6:IT-4F/MoO<sub>3</sub>/Al. ZnO precursor was prepared by dissolving zinc acetate in 2-Methoxyethanol with Ethanolamine. The ZnO layer was deposited by spin-coating a ZnO precursor solution at 4500 rpm for 1 min, followed by thermal annealing at 200 °C for 1h. The MoO<sub>3</sub> layer was 10 nm prepared by vacuum evaporation.

### Characterizations:

The *J-V* characteristics were performed in N<sub>2</sub>-filled glovebox under AM 1.5G (100 mW/cm<sup>2</sup>) by using a Keithley 2400 source meter unit and an AAA solar simulator (SS-F5-3A, Enli

Technology CO., Ltd.) calibrated by a standard Si photovoltaic cell with a KG5 filter. The  $J$ - $V$  measurement was made at the sweep speed of  $0.02 \text{ V s}^{-1}$  and scan direction of  $-0.5 \text{ V}$  to  $1.0 \text{ V}$  under the room temperature (about  $25 \text{ }^\circ\text{C}$ ). For the device of  $4 \text{ mm}^2$  effective area, the  $J$ - $V$  characteristics was measured without aperture. For large-area device of  $90 \text{ mm}^2$  device area, the  $J$ - $V$  measurement was made with an aperture (or mask) of  $56 \text{ mm}^2$ . The EQE was measured by a solar cell spectral response measurement system (QE-R3018, Enli Technology CO., Ltd.) with the calibrated light intensity by a standard single-crystal Si photovoltaic cell. The film thickness was measured by a surface profilometer (Dektak XT, Bruker). The UV-Vis absorption spectrum was measured by a Shimadzu UV-3600 Plus Spectrophotometer. TEM characterization was performed by a FEI Talos F200c transmission electron microscope at  $200 \text{ kV}$  with the film thickness of about  $60 \text{ nm}$ .

Grazing incidence wide-angle x-ray scattering (GIWAXS) characterization: GIWAXS<sup>2</sup> measurements were performed at beamline 7.3.3 at the Advanced Light Source. Samples were prepared on Si substrates using identical blend solutions as those used in devices. The  $10 \text{ keV}$  X-ray beam was incident at a grazing angle of  $0.11$ - $0.15^\circ$ , selected to maximize the scattering intensity from the samples. The scattered x-rays were detected using a Dectris Pilatus 2 M photon counting detector.

Resonant Soft X-ray Scattering (RSoXS): RSoXS<sup>3, 4</sup> transmission measurements were performed at beamline 11.0.1.2 at the Advanced Light Source. Samples for RSoXS measurements were prepared on a PEDOT:PSS modified Si substrate under the same conditions as those used for device fabrication, and then transferred by floating in water to a  $1.5 \text{ mm} \times 1.5 \text{ mm}$ ,  $100 \text{ nm}$  thick  $\text{Si}_3\text{N}_4$  membrane supported by a  $5 \text{ mm} \times 5 \text{ mm}$ ,  $200 \text{ }\mu\text{m}$  thick Si frame (Norcada Inc.). 2D scattering patterns were collected on an in-vacuum CCD camera (Princeton Instrument PI-MTE). The sample detector distance was calibrated from diffraction peaks of a triblock copolymer poly(isoprene-*b*-styrene-*b*-2-vinyl pyridine), which has a known spacing of  $391 \text{ \AA}$ . The beam size at the sample is approximately  $100 \text{ }\mu\text{m}$  by  $200 \text{ }\mu\text{m}$ .

Hole and electron mobility measurements: The mobilities were measured by using space charge limited current (SCLC) model<sup>5, 6</sup> with the hole-only device of ITO/PEDOT:PSS/PM6:IT-4F/MoO<sub>3</sub>/Al and electron-only device of ITO/ZnO/PM6:IT-4F/ZrAcac/Al. Hole mobility and electron mobility were obtained by fitting the current density-voltage curves and calculated by the equation:

$$J=9\varepsilon_0\varepsilon_r\mu(V_{appl}-V_{bi}-V_s)^2/8L^3$$

Where  $J$  is current density,  $\varepsilon_0$  is the permittivity of free space,  $\varepsilon_r$  is the relative permittivity of the material (assumed to 3),  $\mu$  is hole mobility or electron mobility,  $V_{appl}$  is applied voltage,  $V_{bi}$  is the built-in voltage (0 V),  $V_s$  is the voltage drop from the substrate's series resistance ( $V_s=IR$ ) and  $L$  is the thickness of film.

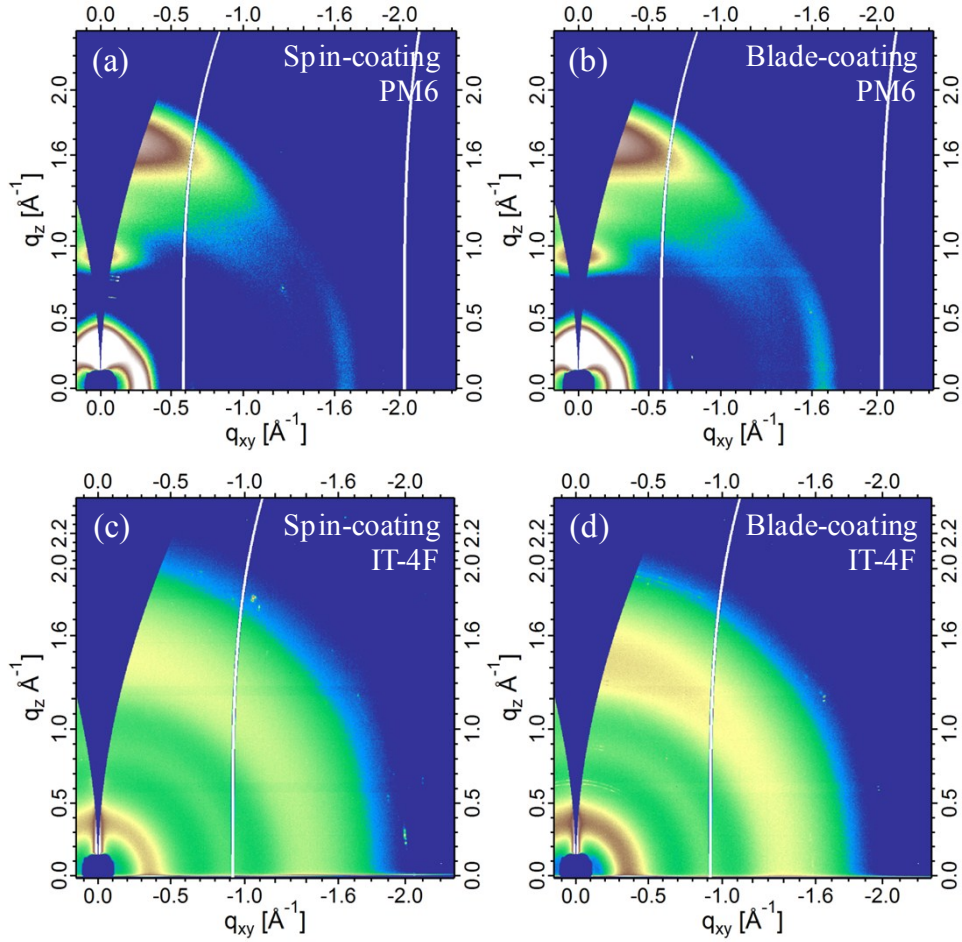

Fig. S1. 2D GIWAXS scattering patterns of PM6 and IT-4F films prepared by spin-coating and blade-coating.

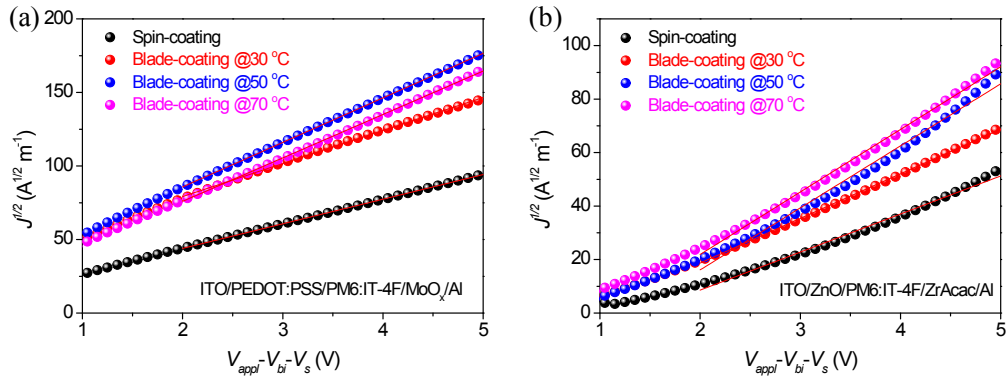

Fig. S2.  $J^{1/2}$ - $V$  characteristics of (a) hole-only and (b) electron-only devices based on the PM6:IT-4F blends. The lines present linear fitting results.

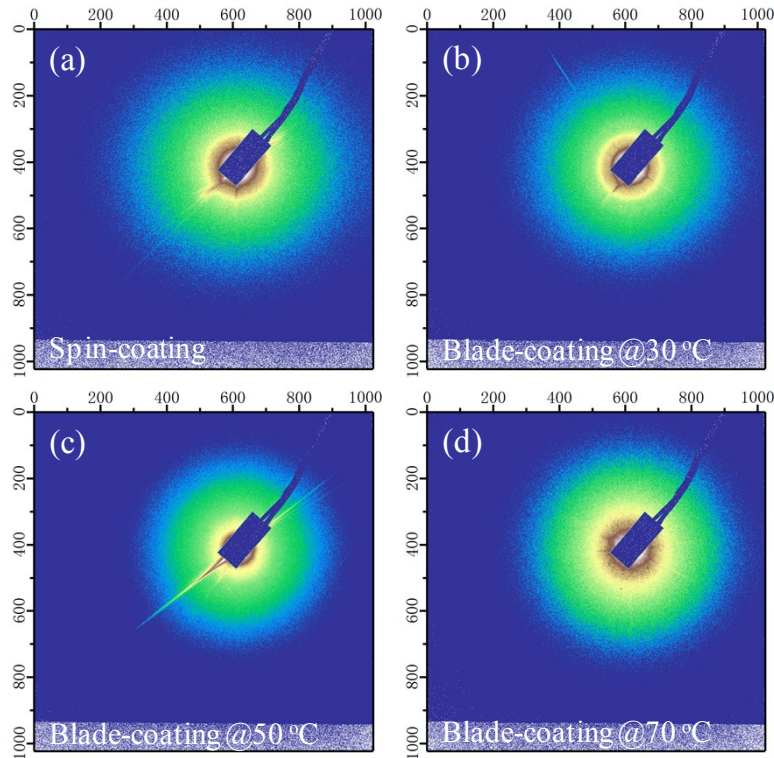

Fig. S3. 2D RSoXS patterns at the X-ray energy of 284.8 eV for the PM6:IT-4F films of spin-coating (a), blade-coating @30 °C (b), blade-coating @50 °C (c) and blade-coating @70 °C (d).

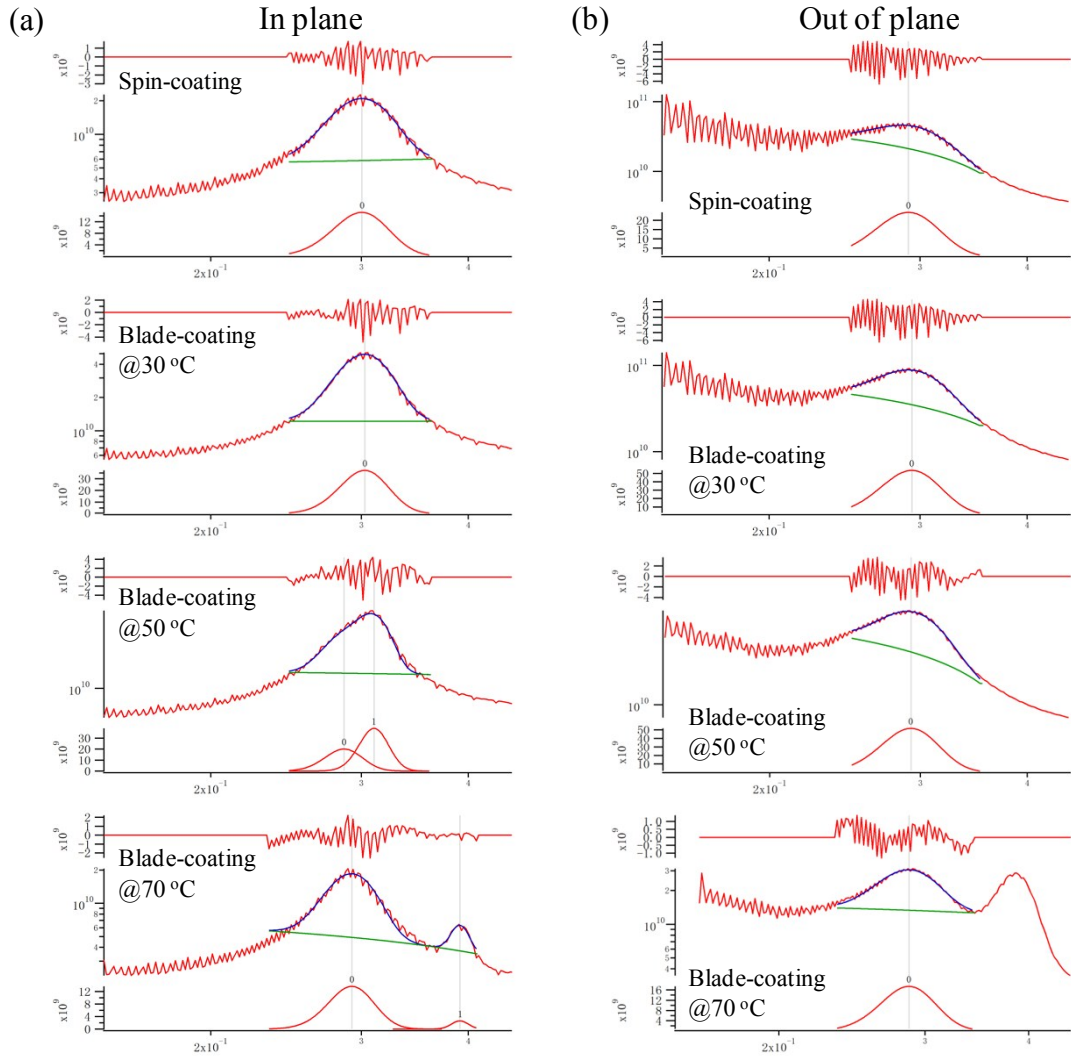

Fig. S4. The fitting results of in plane GIWAXS profiles (a) and out of plane GIWAXS profiles (b) for the PM6:IT-4F films

Table S1. The summarized fitting results of GIWAXS data.

|                      | PM6 (100) in plane   |                         | PM6 (100) out of plane |                         | IT-4F (001) in plane |                         | IT-4F (100) in plane |                         |
|----------------------|----------------------|-------------------------|------------------------|-------------------------|----------------------|-------------------------|----------------------|-------------------------|
|                      | q (Å <sup>-1</sup> ) | FWHM (Å <sup>-1</sup> ) | q (Å <sup>-1</sup> )   | FWHM (Å <sup>-1</sup> ) | q (Å <sup>-1</sup> ) | FWHM (Å <sup>-1</sup> ) | q (Å <sup>-1</sup> ) | FWHM (Å <sup>-1</sup> ) |
| Spin-coating         | 0.30                 | 0.053                   | 0.29                   | 0.060                   | -                    | -                       | -                    | -                       |
| Blade-coating @30 °C | 0.30                 | 0.047                   | 0.29                   | 0.057                   | -                    | -                       | -                    | -                       |
| Blade-coating @50 °C | 0.29                 | 0.034                   | 0.29                   | 0.054                   | 0.31                 | 0.029                   | -                    | -                       |
| Blade-coating @70 °C | 0.29                 | 0.042                   | 0.29                   | 0.052                   | -                    | -                       | 0.39                 | 0.021                   |

Table S2. Summarized photovoltaic parameters of PM6:IT-4F devices at different active layer thicknesses under illumination of AM 1.5G, 100 mW cm<sup>-2</sup>. (The effective device area is 4 mm<sup>2</sup>. Average values are obtained from 15 devices)

|                         | $V_{oc}$ (V) | $J_{sc}$ (mA cm <sup>-2</sup> ) | FF (%)     | PCE (%)            | Thickness (nm) |
|-------------------------|--------------|---------------------------------|------------|--------------------|----------------|
| Spin-coating            | 0.87±0.01    | 16.02±0.41                      | 70.78±0.52 | 9.86±0.38 (10.24)  | 79             |
|                         | 0.88±0.01    | 18.99±0.52                      | 70.47±0.81 | 11.78±0.43 (12.21) | 103            |
|                         | 0.88±0.01    | 17.92±0.44                      | 67.96±0.75 | 10.72±0.36 (11.08) | 149            |
|                         | 0.87±0.01    | 17.68±0.39                      | 64.64±0.70 | 9.94±0.30 (10.24)  | 186            |
|                         | 0.85±0.01    | 17.24±0.46                      | 61.37±0.66 | 9.27±0.38 (9.65)   | 233            |
|                         | 0.85±0.01    | 16.72±0.37                      | 51.35±0.83 | 7.30±0.28 (7.58)   | 330            |
|                         | 0.83±0.02    | 14.63±0.58                      | 48.79±0.78 | 5.92±0.29 (6.21)   | 398            |
|                         | 0.83±0.02    | 12.68±0.55                      | 44.25±0.69 | 4.52±0.44 (4.96)   | 480            |
| Blade-coating<br>@30 °C | 0.87±0.01    | 18.54±0.44                      | 68.01±0.68 | 10.97±0.33 (11.30) | 96             |
|                         | 0.87±0.01    | 19.89±0.59                      | 68.39±0.62 | 11.83±0.42 (12.25) | 132            |
|                         | 0.87±0.01    | 18.78±0.41                      | 67.69±0.77 | 11.06±0.29 (11.35) | 178            |
|                         | 0.86±0.01    | 18.08±0.36                      | 65.09±0.56 | 10.12±0.31 (10.43) | 212            |
|                         | 0.85±0.01    | 17.62±0.40                      | 61.46±0.58 | 9.20±0.31 (9.51)   | 266            |
|                         | 0.84±0.01    | 16.36±0.52                      | 58.94±0.78 | 8.10±0.39 (8.49)   | 325            |
|                         | 0.83±0.02    | 15.65±0.62                      | 50.54±0.70 | 6.56±0.37 (6.93)   | 415            |
|                         | 0.82±0.02    | 14.43±0.58                      | 44.44±0.72 | 5.17±0.39 (5.56)   | 490            |
| Blade-coating<br>@50 °C | 0.88±0.01    | 19.01±0.46                      | 69.90±0.59 | 11.69±0.42 (12.11) | 98             |
|                         | 0.88±0.01    | 20.76±0.61                      | 72.00±0.55 | 13.15±0.49 (13.64) | 134            |
|                         | 0.88±0.01    | 19.87±0.43                      | 70.29±0.71 | 12.29±0.32 (12.61) | 172            |
|                         | 0.87±0.01    | 19.73±0.32                      | 69.26±0.65 | 11.89±0.29 (12.18) | 216            |
|                         | 0.86±0.01    | 20.05±0.52                      | 62.29±0.68 | 10.78±0.33 (11.11) | 275            |
|                         | 0.85±0.01    | 19.60±0.50                      | 58.71±0.51 | 9.73±0.39 (10.12)  | 343            |
|                         | 0.85±0.01    | 18.75±0.45                      | 55.69±0.73 | 8.78±0.36 (9.14)   | 401            |
|                         | 0.84±0.02    | 16.20±0.55                      | 49.42±0.77 | 6.78±0.41 (7.19)   | 515            |
| Blade-coating<br>@70 °C | 0.86±0.02    | 20.26±0.51                      | 68.22±0.60 | 11.88±0.45 (12.33) | 102            |
|                         | 0.87±0.01    | 20.84±0.63                      | 70.18±0.71 | 12.74±0.52 (13.24) | 141            |
|                         | 0.86±0.01    | 20.75±0.53                      | 68.00±0.57 | 12.13±0.38 (12.51) | 190            |
|                         | 0.86±0.01    | 19.60±0.40                      | 68.31±0.62 | 11.65±0.28 (11.93) | 241            |
|                         | 0.86±0.01    | 19.69±0.47                      | 66.76±0.68 | 11.30±0.34 (11.64) | 270            |
|                         | 0.85±0.01    | 19.08±0.39                      | 65.99±0.85 | 10.83±0.33 (11.16) | 315            |
|                         | 0.83±0.02    | 19.40±0.56                      | 58.98±0.77 | 9.86±0.36 (10.22)  | 409            |
|                         | 0.82±0.02    | 18.56±0.65                      | 55.34±0.71 | 8.85±0.30 (9.15)   | 502            |

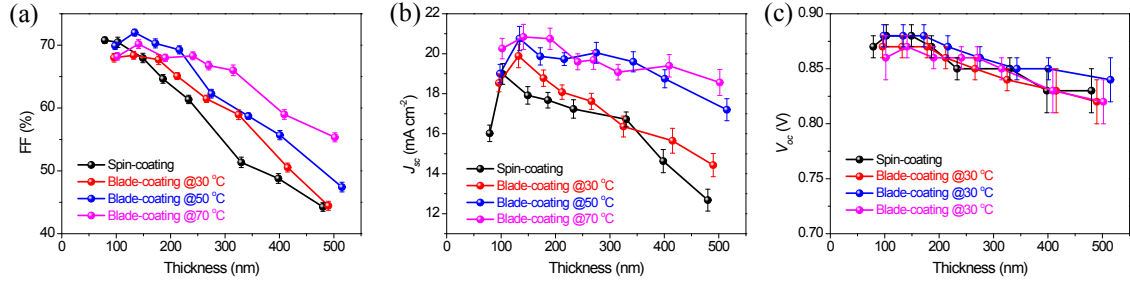

Fig. S5. (a) FF, (b)  $J_{sc}$  and (c)  $V_{oc}$  values versus the active layer thickness of PM6:IT-4F devices.

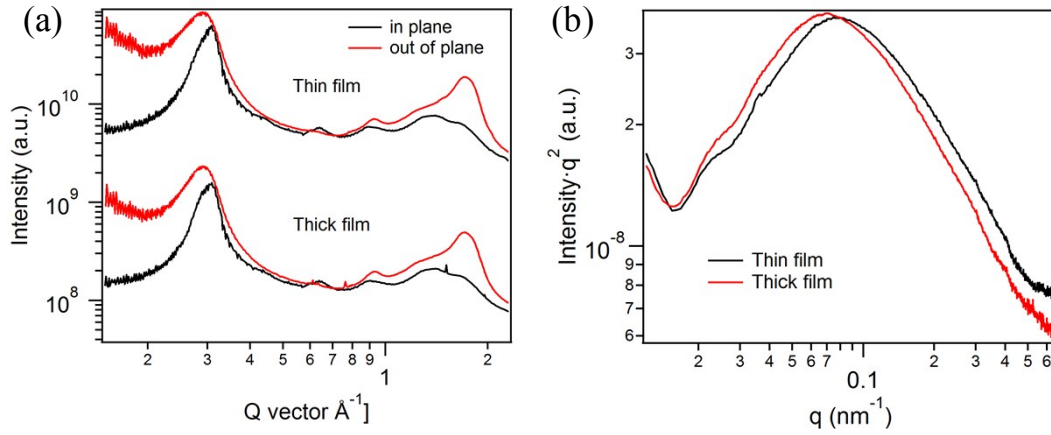

Fig. S6. (a) GIWAXS profiles and (b) RSoXS profiles of blade-coated thin film and thick film.

Table S3. Photovoltaic parameters of blade-coated @70 °C large-area devices with various thickness of active layer under illumination of AM 1.5G, 100 mW cm<sup>-2</sup>. (The device area is 90 mm<sup>2</sup> and the aperture area is 56 mm<sup>2</sup>. Average values are obtained from 15 devices)

| Thickness (nm) | $V_{oc}$ (V) | $J_{sc}$ (mA cm <sup>-2</sup> ) | FF (%)     | PCE (%) (PCE <sub>max</sub> ) |
|----------------|--------------|---------------------------------|------------|-------------------------------|
| 135            | 0.83±0.01    | 19.28±0.61                      | 67.56±0.85 | 10.77±0.62 (11.39)            |
| 160            | 0.83±0.01    | 19.33±0.63                      | 66.73±0.82 | 10.56±0.55 (11.11)            |
| 171            | 0.83±0.01    | 19.44±0.56                      | 66.61±0.77 | 10.41±0.66 (11.07)            |
| 188            | 0.83±0.01    | 19.35±0.53                      | 65.99±0.90 | 10.32±0.61 (10.93)            |
| 252            | 0.83±0.01    | 18.80±0.32                      | 63.45±0.75 | 9.70±0.58 (10.28)             |
| 306            | 0.83±0.01    | 19.69±0.51                      | 57.59±0.71 | 9.24±0.52 (9.76)              |



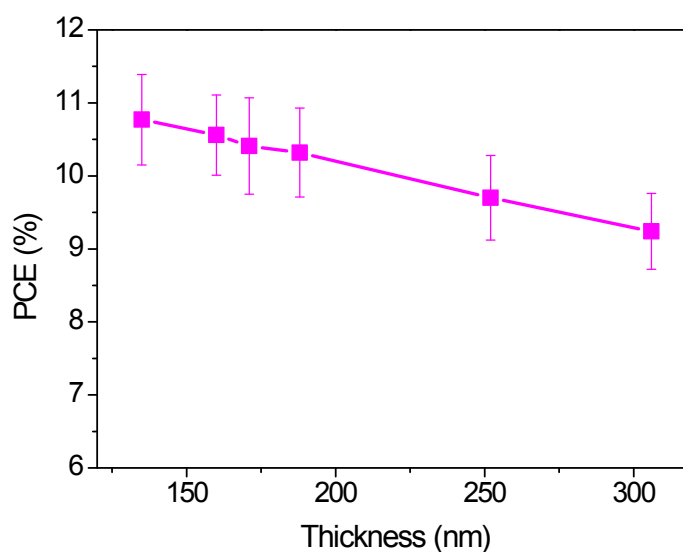

Fig. S7. PCE values versus the thickness of active layer for the blade-coated @70 °C large-area devices. The device area is 90 mm<sup>2</sup> and the aperture area is 56 mm<sup>2</sup>.

## References

1. Z. A. Tan, S. S. Li, F. Z. Wang, D. P. Qian, J. Lin, J. H. Hou and Y. F. Li, *Sci. Rep.*, 2014, **4**, 4691.
2. A. Hexemer, W. Bras, J. Glossinger, E. Schaible, E. Gann, R. Kirian, A. MacDowell, M. Church, B. Rude and H. Padmore, *J. Phy. Conf. Ser.*, 2010, **247**, 012007.
3. E. Gann, A. T. Young, B. A. Collins, H. Yan, J. Nasiatka, H. A. Padmore, H. Ade, A. Hexemer and C. Wang, *Rev. Sci. Instrum.*, 2012, **83**, 045110.
4. Y. Wu, Z. Y. Wang, X. Y. Meng and W. Ma, *Prog. Chem.*, 2017, **29**, 93-101.
5. J. A. Bartelt, D. Lam, T. M. Burke, S. M. Sweetnam and M. D. McGehee, *Adv. Energy Mater.*, 2015, **5**, 1500577.
6. S. S. Chen, Y. H. Liu, L. Zhang, P. C. Y. Chow, Z. Wang, G. Y. Zhang, W. Ma and H. Yan, *J. Amer. Chem. Soc.*, 2017, **139**, 6298-6301.
